# Supplementary material
Source: PubMed Central journal article supplement (PMC4413916)
Supplement: NIHMS681601-supplement-1.pdf [file NIHMS681601-supplement-1.pdf]

Supplemental Figure 1

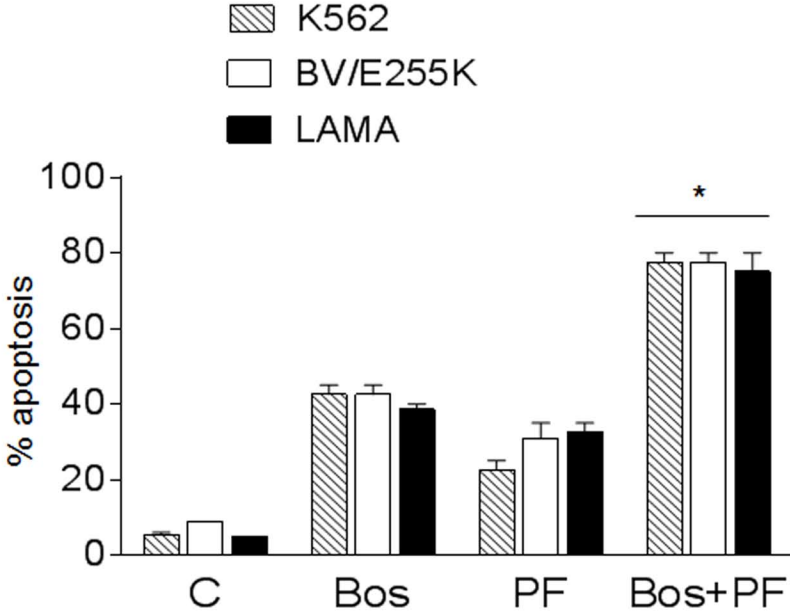

K562, LAMA, BV173/E255K cells were exposed to bosutinib (20-150 nmol/L) and/or PF (0.05-0.3  $\mu$ mol/L) for 48-72h, after which the percentage of apoptotic cells was determined by 7-AAD positivity using flow cytometry (\*=  $p < 0.05$ , significantly greater than values obtained for bosutinib or PF treatment alone).
