# Supplementary material
Source: PubMed Central journal article supplement (PMC4413916)
Supplement: NIHMS681601-supplement-2.pdf [file NIHMS681601-supplement-2.pdf]

## Supplemental Figure 2

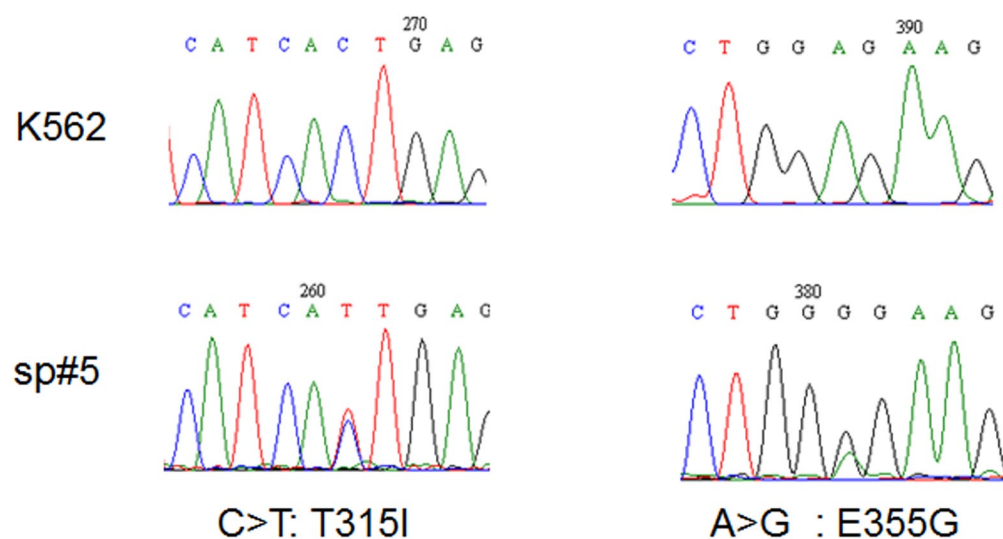

The BCR/ABL kinase domains from all 5 patient samples were sequenced. Specimen #5 exhibited both the T315I and E355G mutations by sequencing.
